## Fractional flow reserve and instantaneous wave-free ratio discordance in patients with severe aortic valve stenosis

F. Yamanaka<sup>1</sup>, K. Shishido<sup>1</sup>, S. Yokota<sup>1</sup>, N. Moriyama<sup>1</sup>, Y. Mashimo<sup>1</sup>, T. Hayashi<sup>1</sup>, H. Miyashita<sup>1</sup>, H. Yokoyama<sup>1</sup>, K. Tobita<sup>1</sup>, S. Mizuno<sup>1</sup>, Y. Tanaka<sup>1</sup>, M. Murakami<sup>1</sup>, S. Takahashi<sup>1</sup>, K. Tsujita<sup>2</sup>, S. Saito<sup>1</sup>

<sup>1</sup>Shonan Kamakura General Hospital, Kamakura, Japan; <sup>2</sup>Kumamoto University Hospital, Department of Cardiovascular Medicine, Kumamoto, Japan

**Funding Acknowledgement:** Type of funding source: None

**Background:** It has been reported that discordance between fractional flow reserve (FFR) and Instantaneous Wave-Free Ratio (iFR) could occur in up to 20% of cases. However, there are no reports regarding discordance between FFR and iFR in patients with severe aortic valve stenosis (AS).

**Purpose:** We aimed to investigate the discordance between FFR and iFR in patients with severe AS.

**Methods:** Severe AS was defined as an aortic-valve area of  $\leq 1.0$  cm<sup>2</sup>, a mean aortic-valve gradient of 40mmHg or more, or a peak aortic-jet velocity of 4.0 m/s or more. Intermediate coronary artery stenosis was defined as 30% to 70% stenosis (visual estimation). FFR and iFR were calculated in 4 quadrants based on values of FFR  $\leq 0.8$  and iFR  $\leq 0.89$  (positive discordance; low FFR and high iFR, negative discordance; high FFR and low iFR).

**Results:** We examined consecutive 140 patients (164 intermediate coronary artery stenosis vessels). Mean FFR and iFR  $\pm$  standard deviation was  $0.82 \pm 0.09$  and  $0.82 \pm 0.14$ , respectively. The discordance was observed in 48 vessels (29.3%). In the discordant group, most of cases were negative discordance (45 cases, 93.6%). Binary logistic regression analysis showed that left anterior descending artery (Hazard Ratio 3.80; 1.55 to 9.31,  $p=0.0036$ ) was independently associated with negative discordance.

**Conclusions:** In patients with severe AS, the discordance between FFR and iFR could be observed in 29.3% of the vessels, mostly negative discordance. The left anterior descending artery is an independent predictor for negative discordance.
